# Supplementary material for: Rare earth-free composites of carbon dots/metal–organic frameworks as white light emitting phosphors
Source: Royal Society of Chemistry journal article supplement (doi:10.1039/c8tc04171g), 2019-01-01
Supplement: c8tc04171g1.pdf [file c8tc04171g1.pdf]

## Supporting Information of

Rare earth-free composites of carbon dots/metal-organic framework as white light-emitting phosphor

Aiwu Wang,<sup>a,b,c,‡</sup> Yun-Long Hou,<sup>d,e,‡</sup> Fengwen Kang,<sup>a,b,c,f</sup> Fucong Lyu,<sup>c,f</sup> Yuan Xiong,<sup>a,g</sup> Wen-Cheng Chen,<sup>d</sup> Chun-Sing Lee,<sup>b,d</sup> Zhengtao Xu,<sup>d</sup> Andrey L. Rogach,<sup>a,g</sup> Jian Lu,<sup>a,c,f,h,\*</sup> Yang Yang Li<sup>a,b,c,g,i,\*</sup>

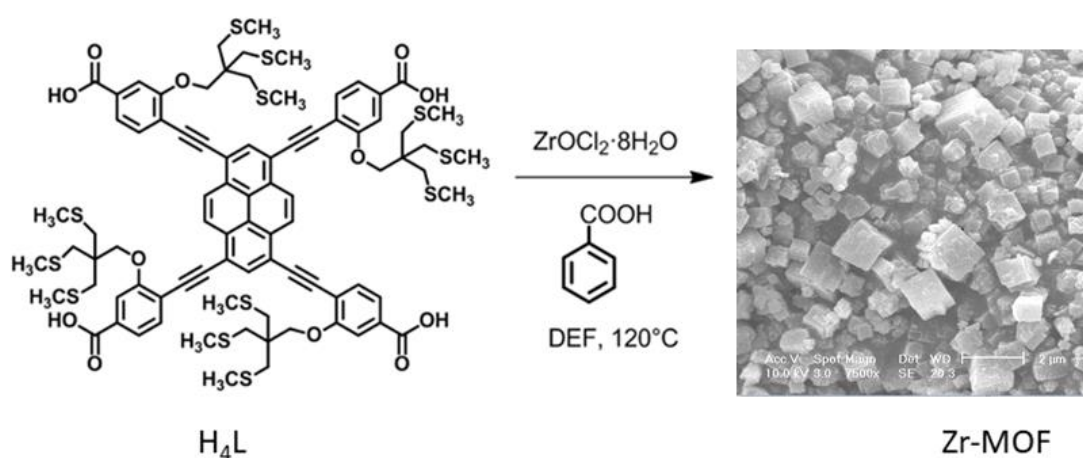

Figure S1. Solvothermal synthesis of Zr-MOF: reaction components, and TEM image of the resulting product.

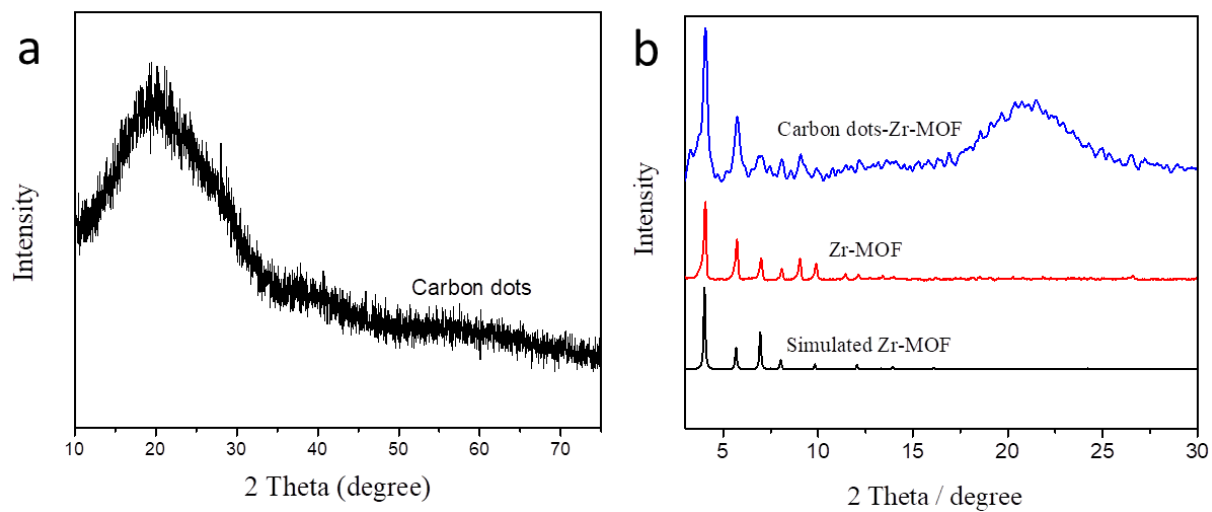

Figure S2. Powder X-ray diffraction patterns of (a) CDs, and 9b) synthesized Zr-MOF, CDs/Zr-MOF composite, and simulated Zr-MOF.

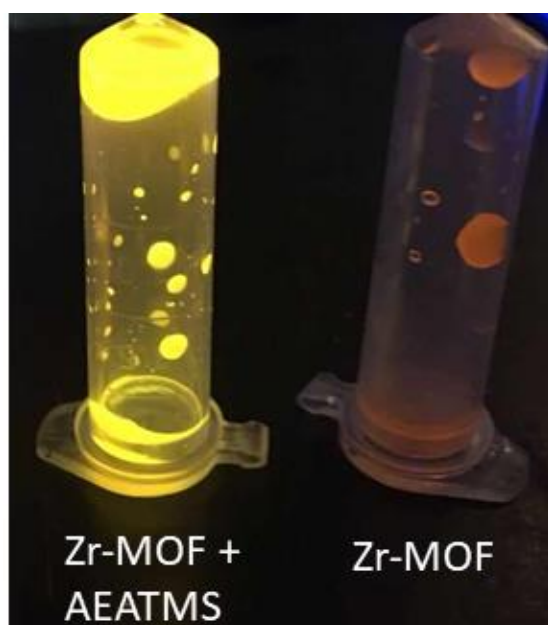

Fig. S3. Photographs of Zr-MOF and AEATMS Zr-MOF under the hand UV (365nm) light.

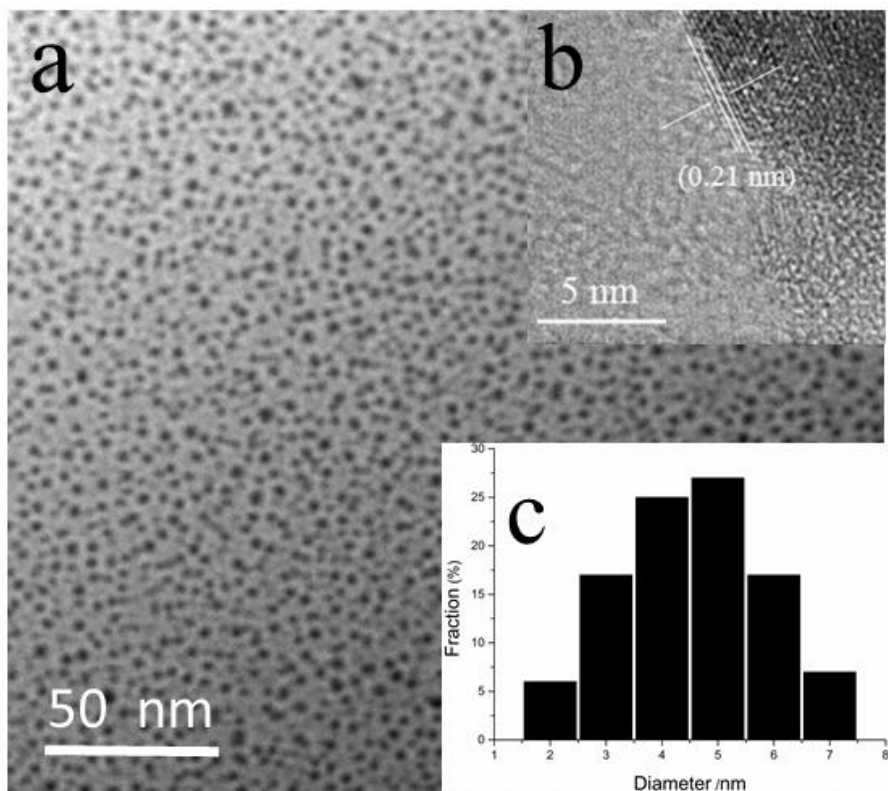

Figure S4. (a) TEM image of CDs; insets in (b) and (c) show HRTEM image of a single CD particle, and the size distribution of the CDs, correspondingly.

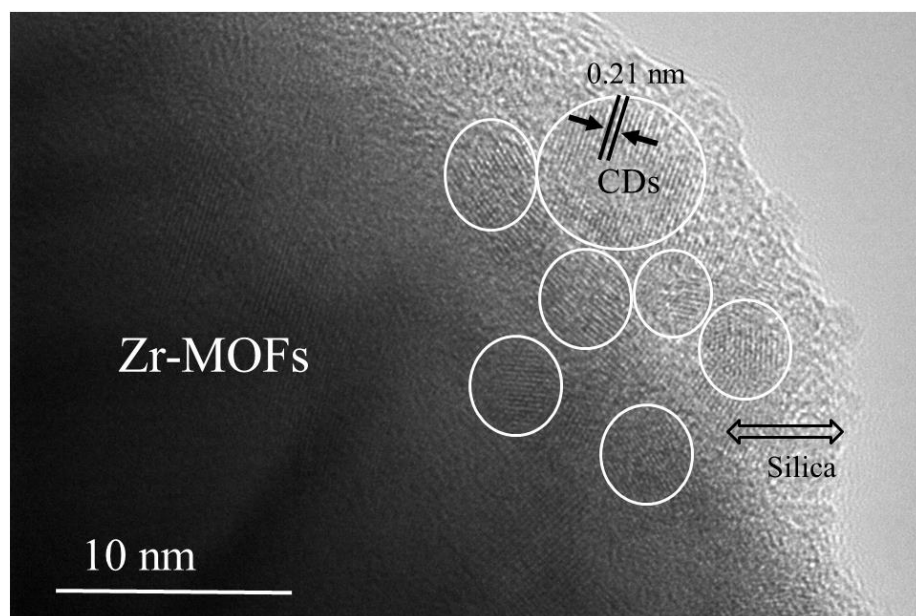

Figure S5. HRTEM image of CDs/Zr-MOFs.

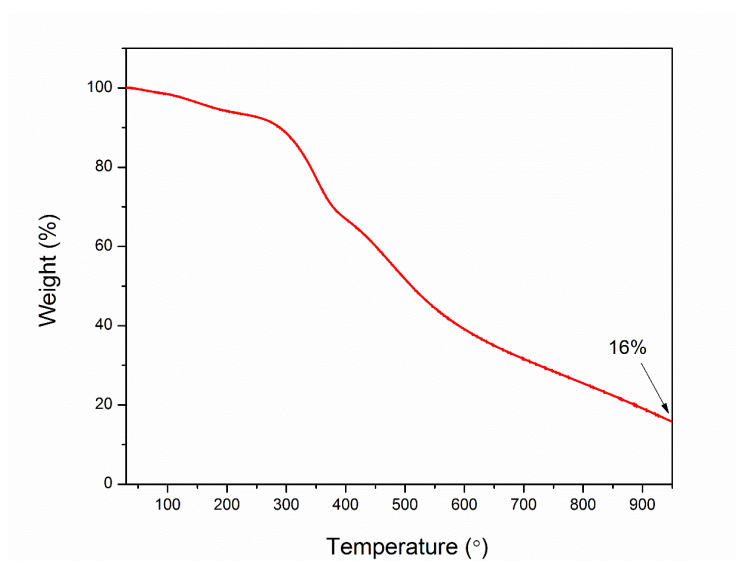

Figure S6. Thermogravimetric analysis (TGA) plot of Zr-MOF (heating rate at 2 °C/min).

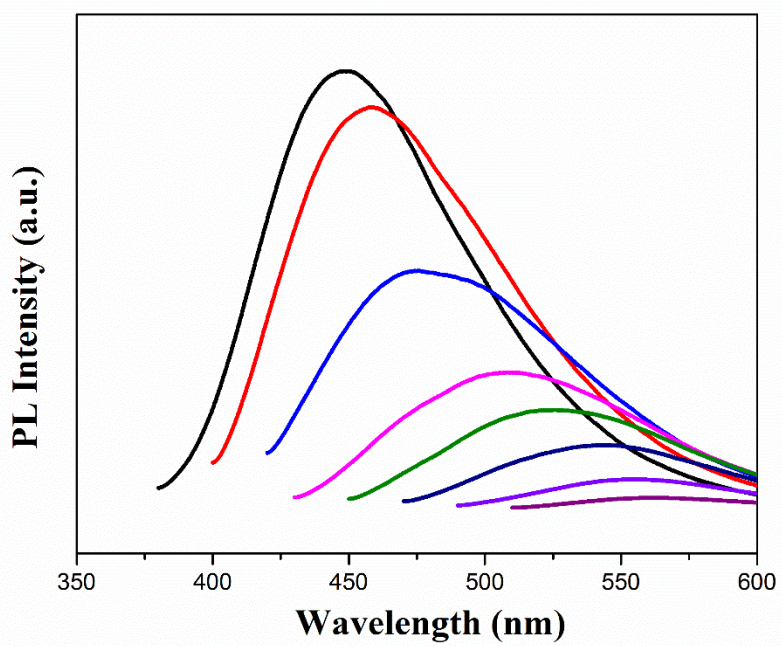

Figure S7. Excitation-dependent PL emission spectra of CDs.

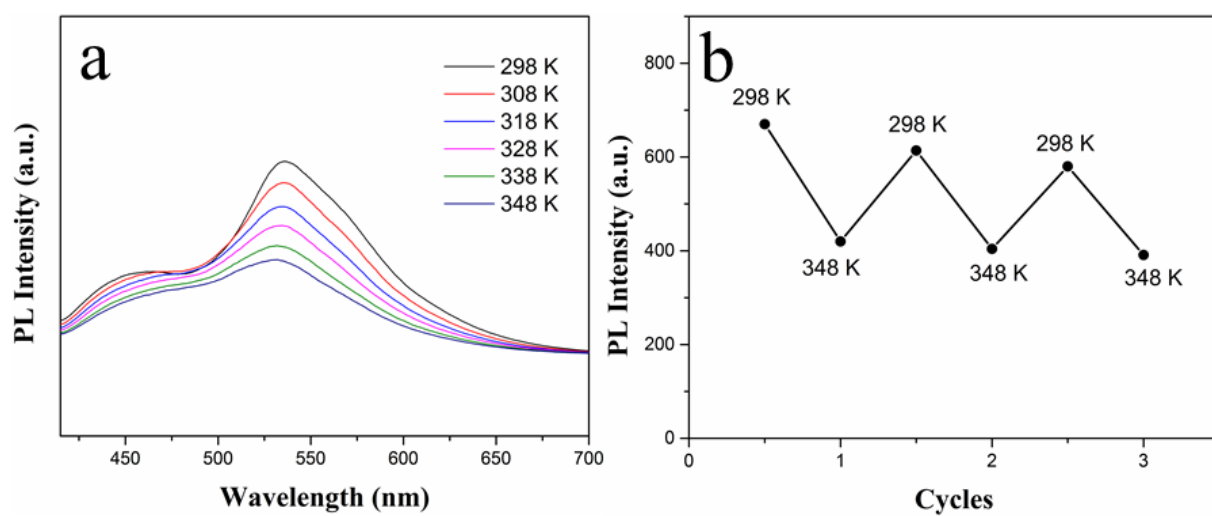

Figure S8. PL emission spectra of CDs/Zr-MOFs obtained at different temperature upon 360 nm excitation (a), and the thermal stability test of CDs/Zr-MOFs (b).
